# Supplementary material for: Vanillin derived a carbonate dialdehyde and a carbonate diol: novel platform monomers for sustainable polymers synthesis
Source: PubMed Central journal article supplement (PMC9087012; doi:10.1039/c8ra07185c), 2018-10-05
Supplement: RA-008-C8RA07185C-s001.pdf [file RA-008-C8RA07185C-s001.pdf]

## Supporting Information

### Vanillin derived a carbonate dialdehyde and a carbonate diol: novel platform monomers for sustainable polymers synthesis

De Bai,<sup>[a]#</sup> Qin Chen,<sup>[a]#</sup> Yang Chai,<sup>[a]</sup> Tianhua Ren,<sup>[a]</sup> Caijuan Huang,<sup>[a]</sup> Qiang Zheng,<sup>[a]</sup> Ian D. V. Ingram,<sup>[b]</sup> Michael North<sup>[b]</sup> and Haibo Xie\*<sup>[a]</sup>

<sup>[a]</sup> Department of Polymeric Materials & Engineering, College of Materials & Metallurgy, Guizhou University, West Campus, Huaxi District, Guiyang, P. R. China, 550025; E-mail:hbxie@gzu.edu.cn

<sup>[b]</sup> Green Chemistry Centre of Excellence, Department of Chemistry, University of York, York (UK) YO10 5DD

#### SFigures

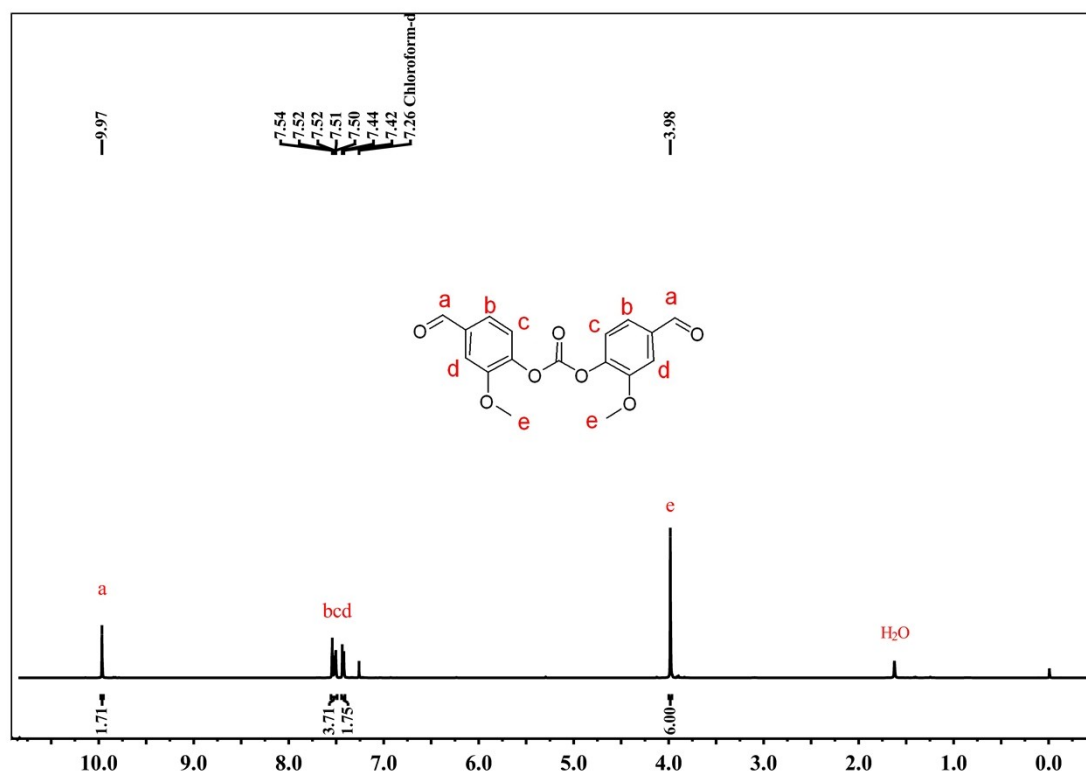

Figure S1. <sup>1</sup>H NMR of BFMC (400 MHz CDCl<sub>3</sub>).

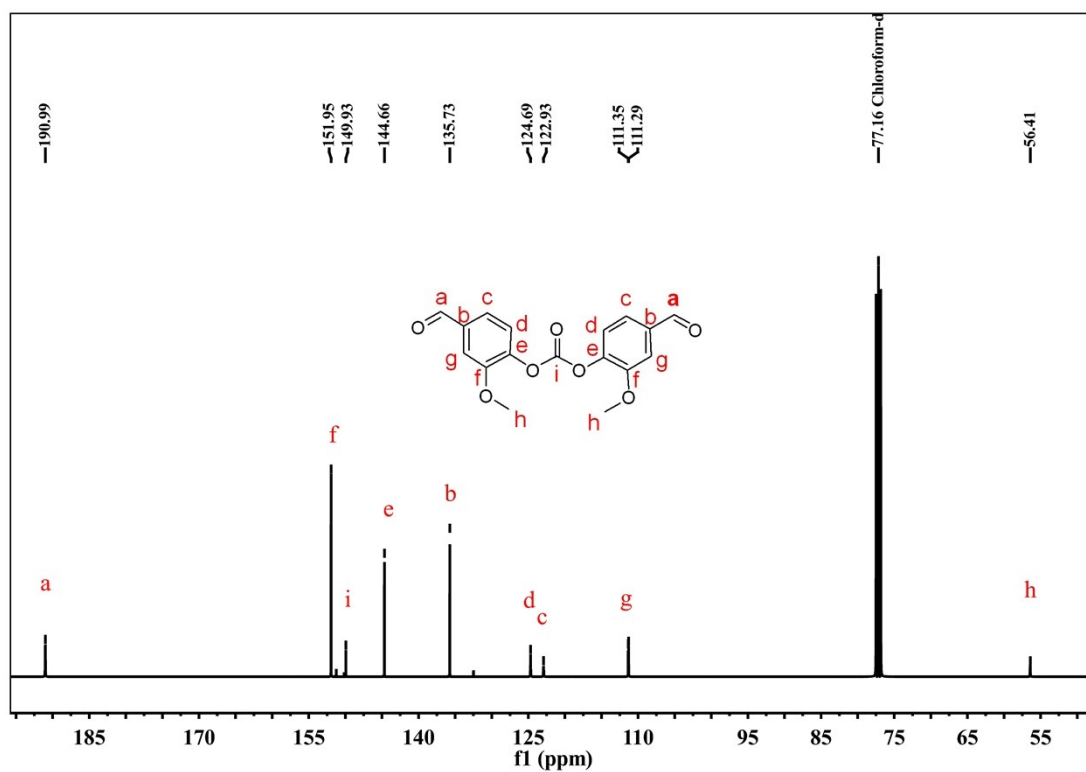

Figure S2. <sup>13</sup>C NMR of BFMC (101 MHz CDCl<sub>3</sub>).

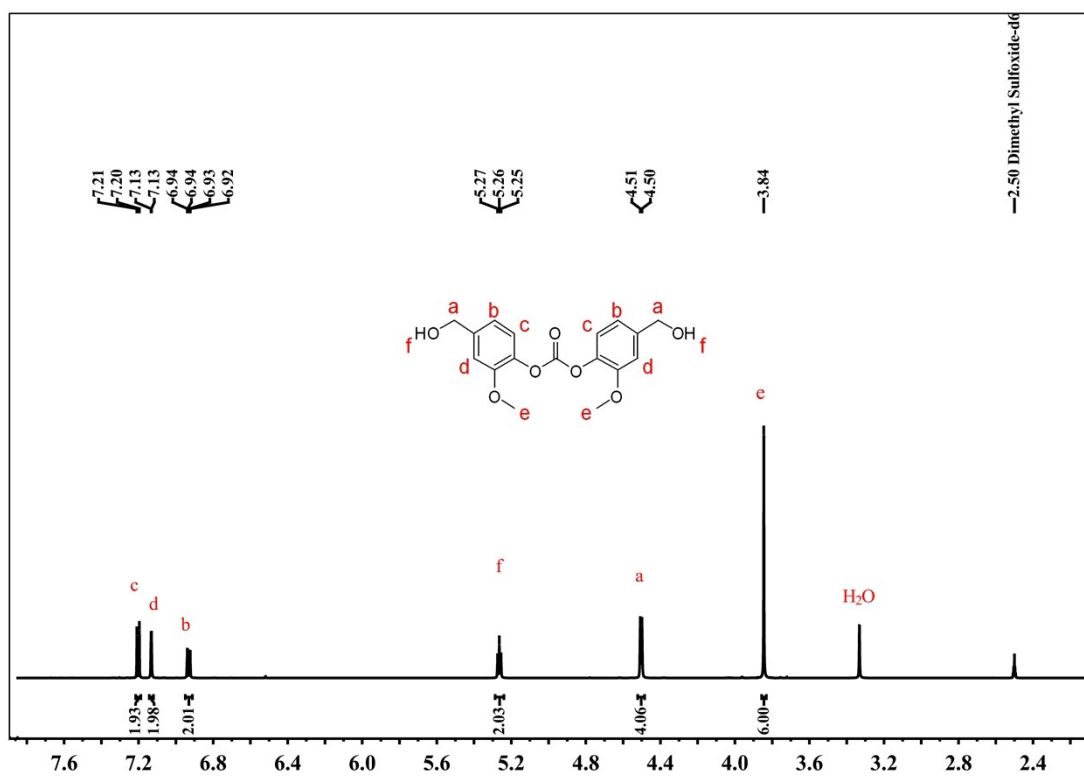

Figure S3. <sup>1</sup>H NMR of BHMC (400 MHz DMSO-d<sub>6</sub>).

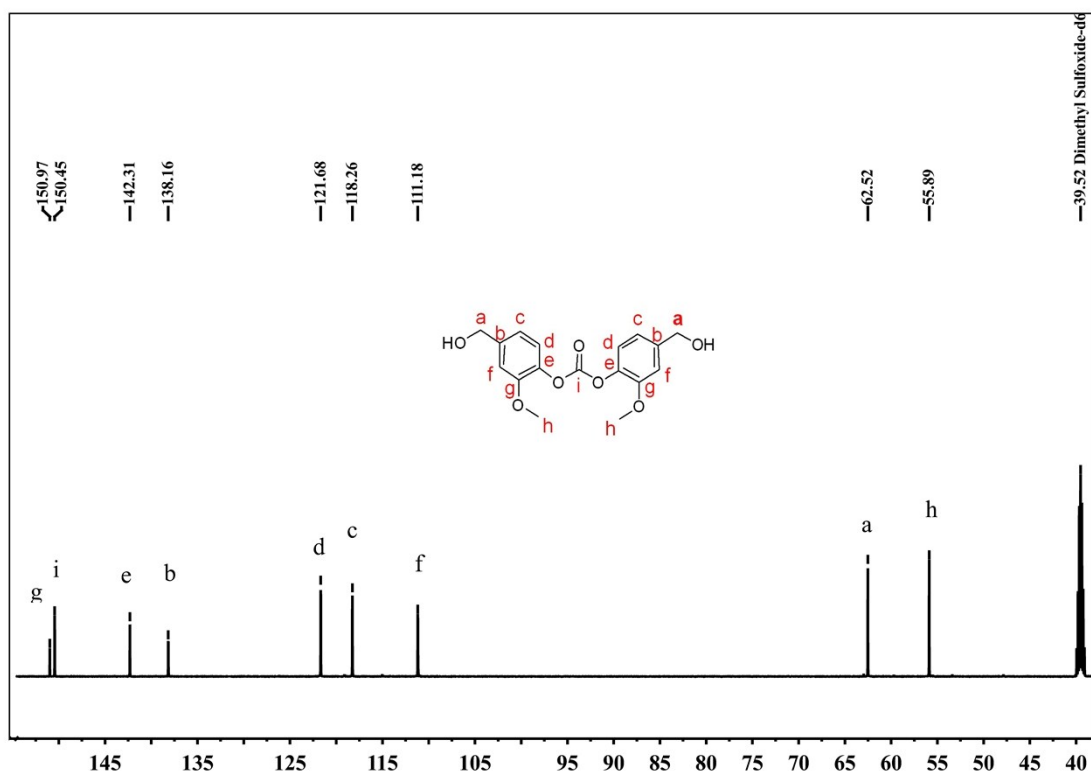

Figure S4.  $^{13}\text{C}$  NMR of BHMC (101 MHz DMSO- $d_6$ ).

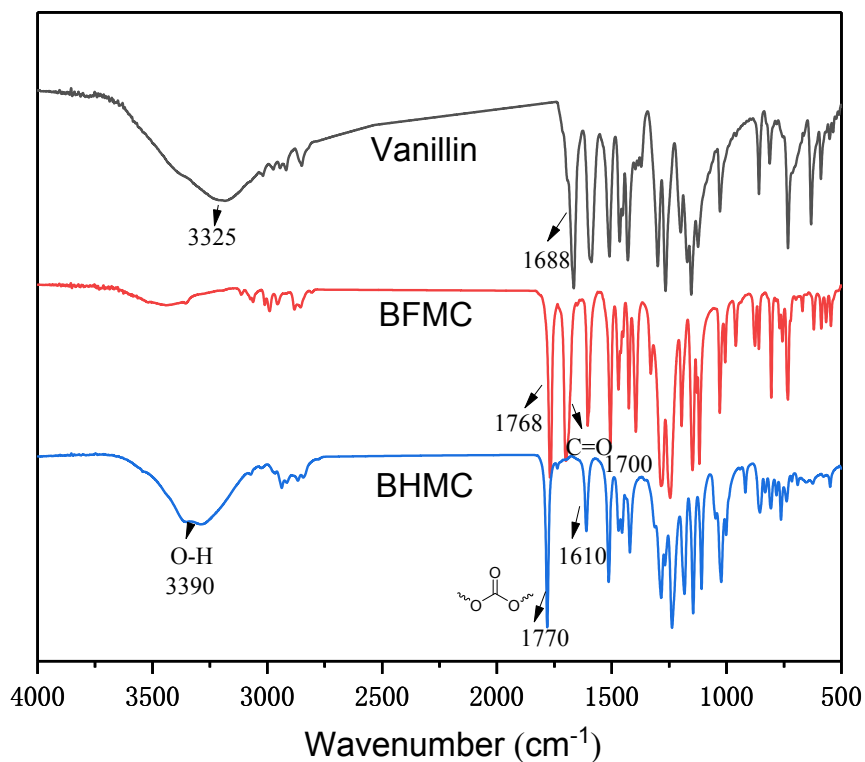

Figure S5. FTIR spectra of BFMC and BHMC derived from vanillin.

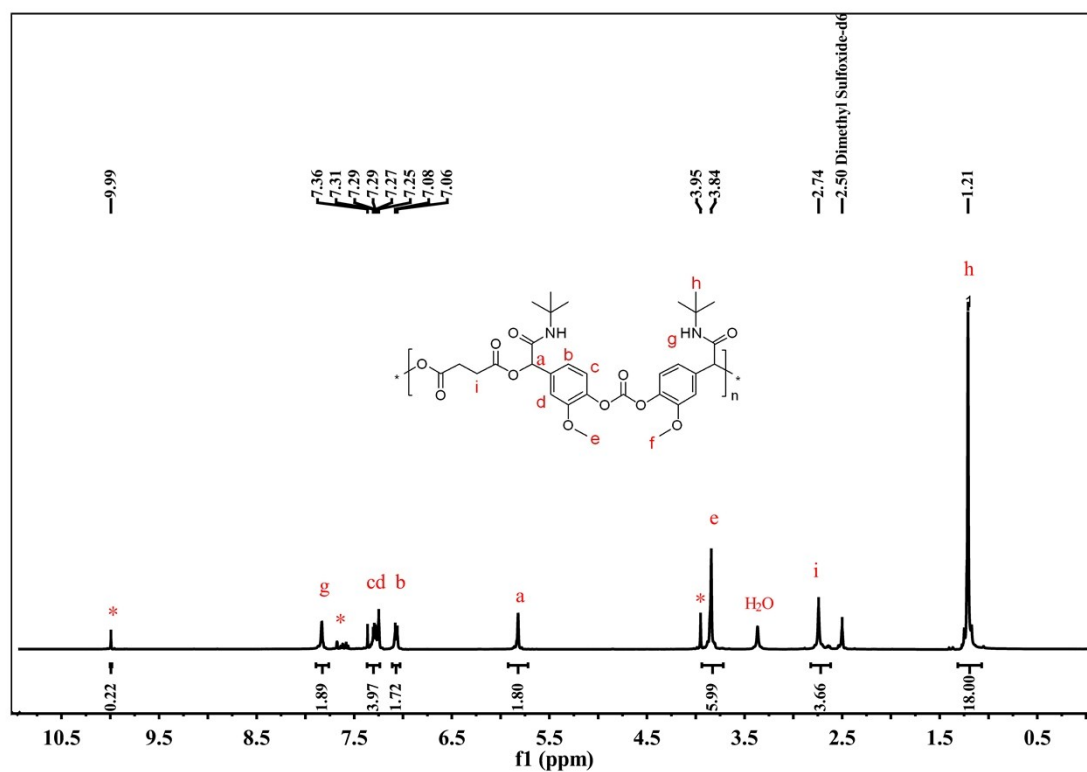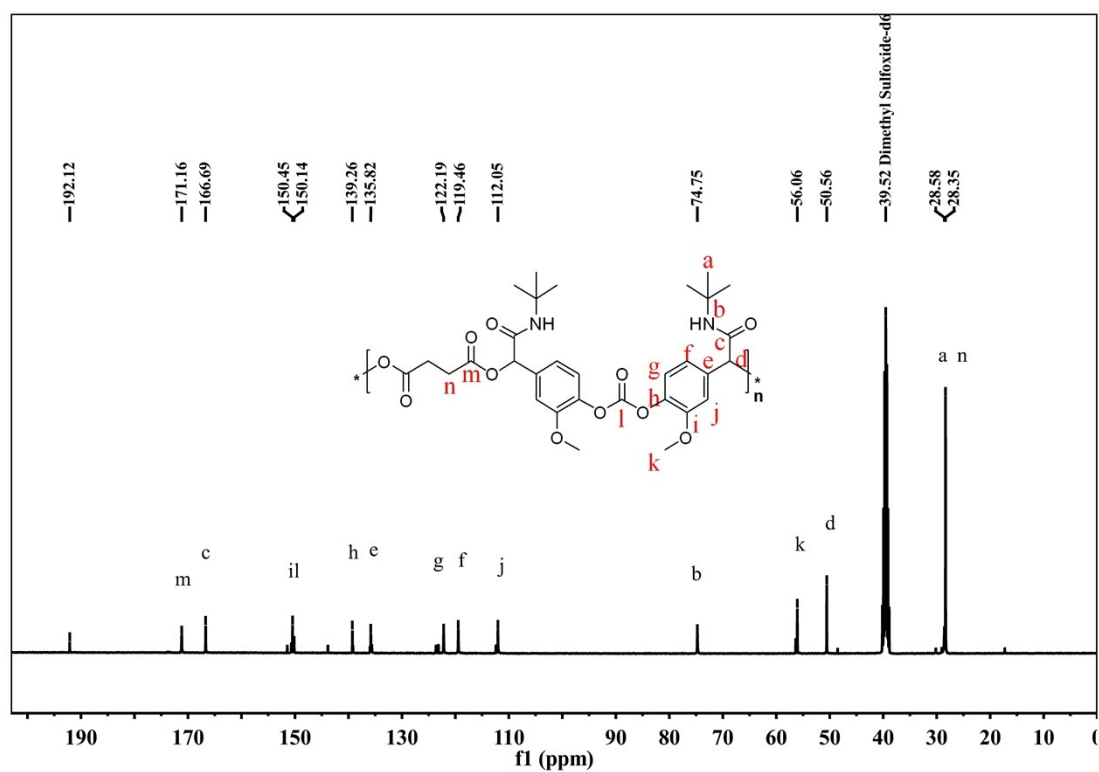

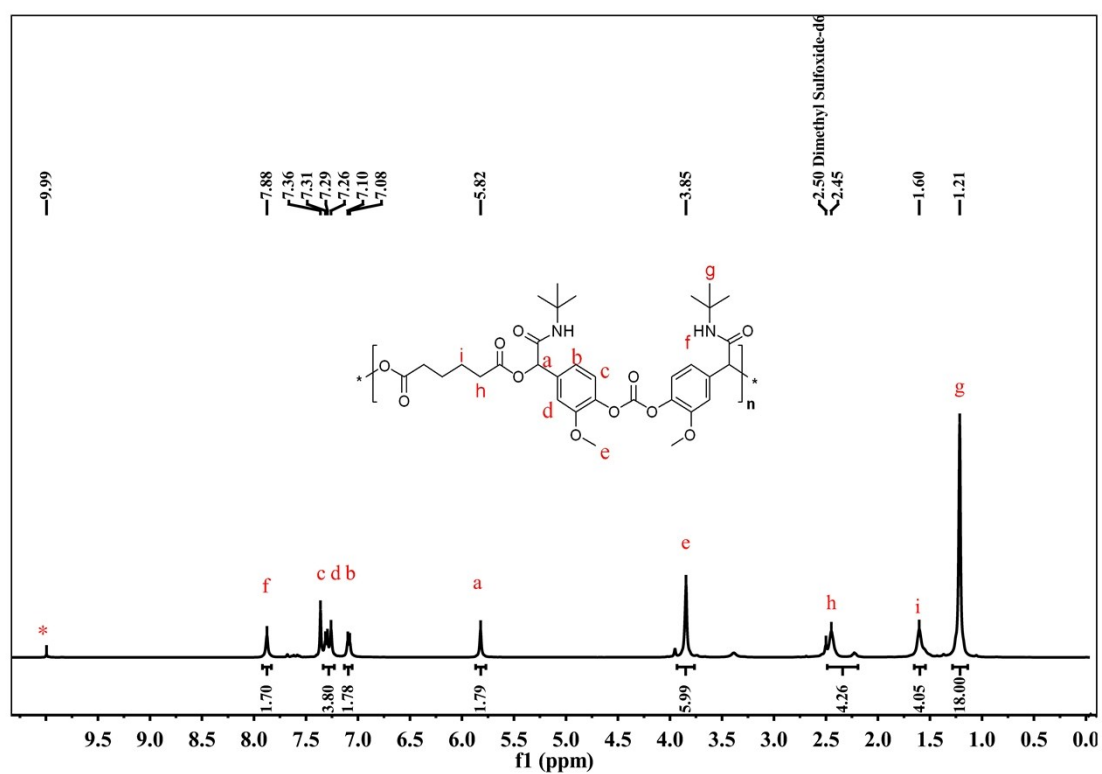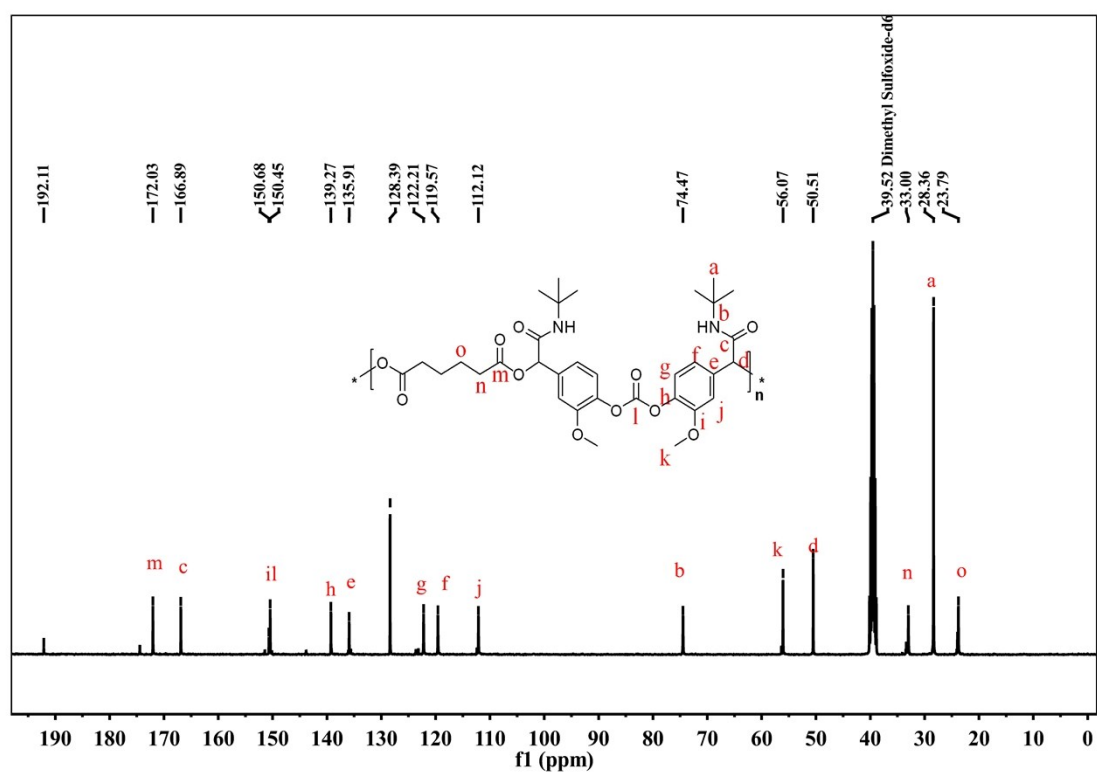

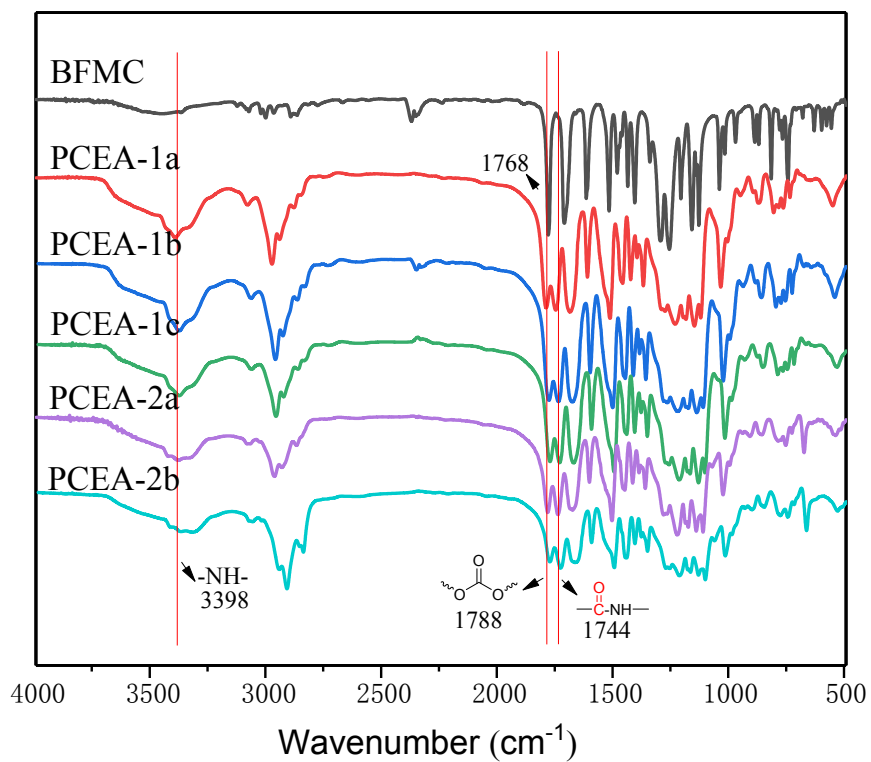

Figure S10. FTIR spectra of BFMC and representative resulting PCEAs.

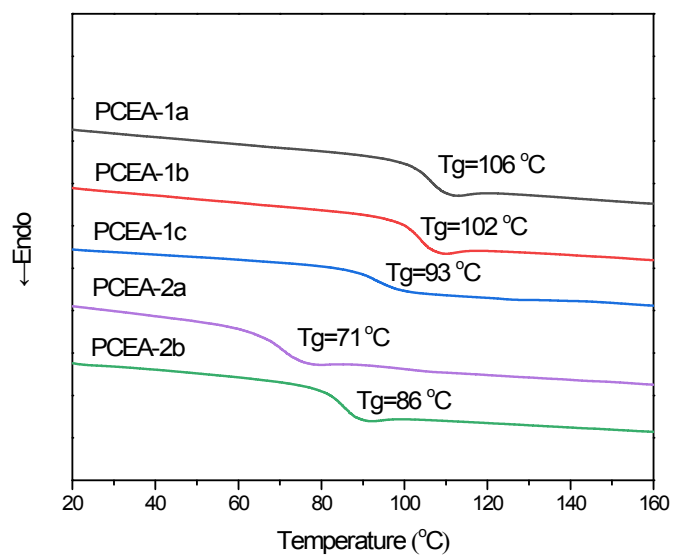

Figure S11. DSC curves of PCEAs.

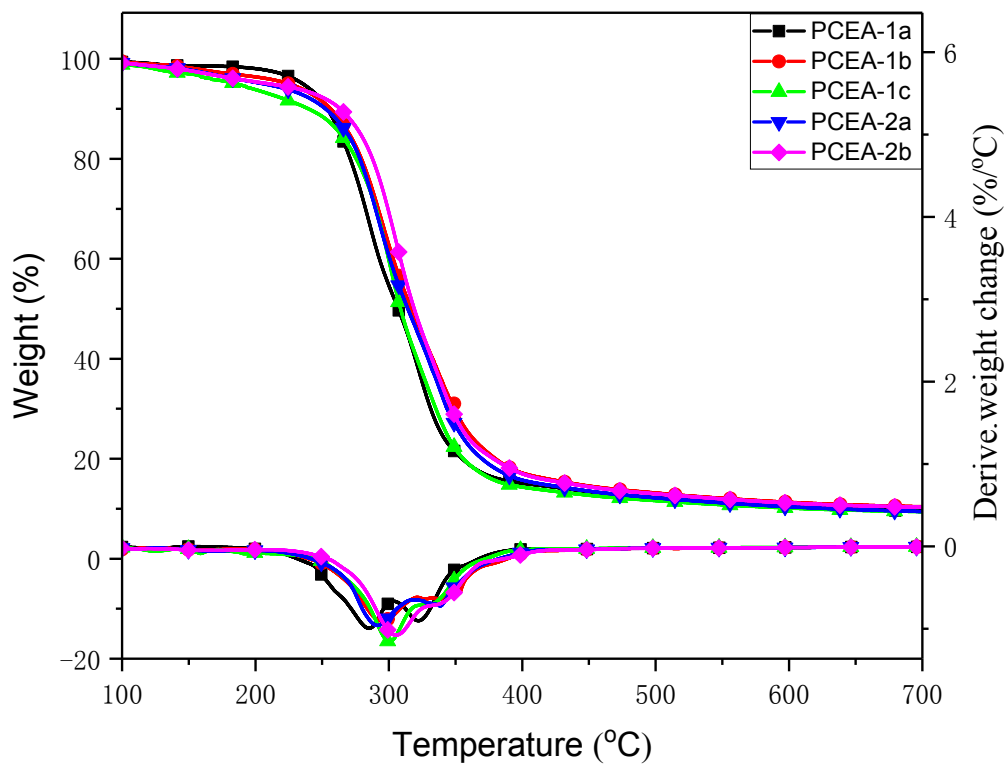

Figure S12. TGA and DTG curves of PCEAs.

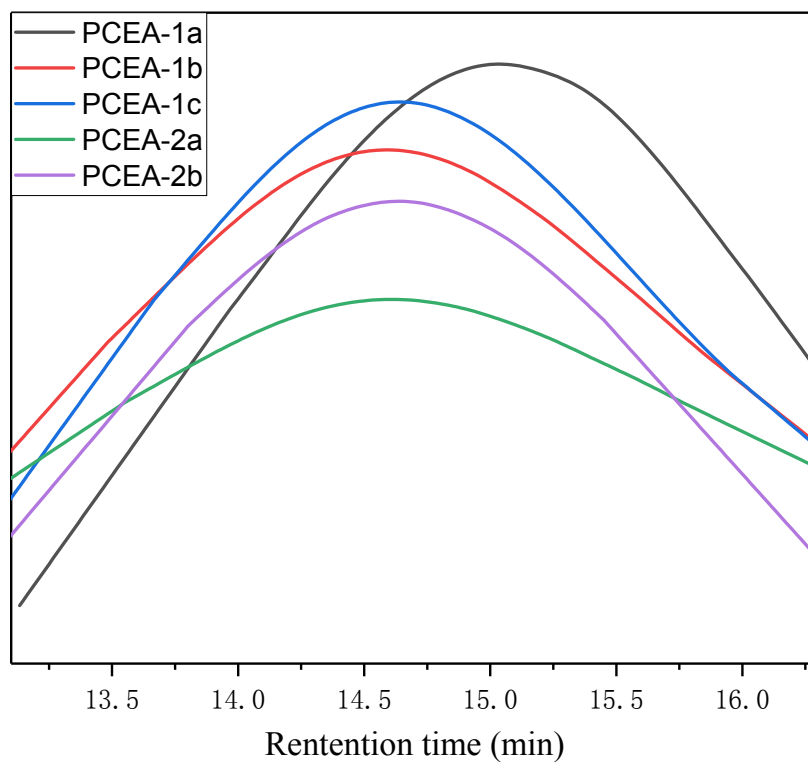

Figure S13. GPC analysis of PCEAs, (PCE-1a,  $M_n=3456\text{g/mol}$ ,  $\bar{D}=1.4$ ; PCE-1b,  $M_n=4663\text{g/mol}$ ,  $\bar{D}=1.6$ ; PCE-1c,  $M_n=4734\text{g/mol}$ ,  $\bar{D}=1.5$ ; PCE-2a,  $M_n=4575\text{g/mol}$ ,  $\bar{D}=1.6$ ; PCE-2b,  $M_n=5251\text{g/mol}$ ,  $\bar{D}=1.3$ ).

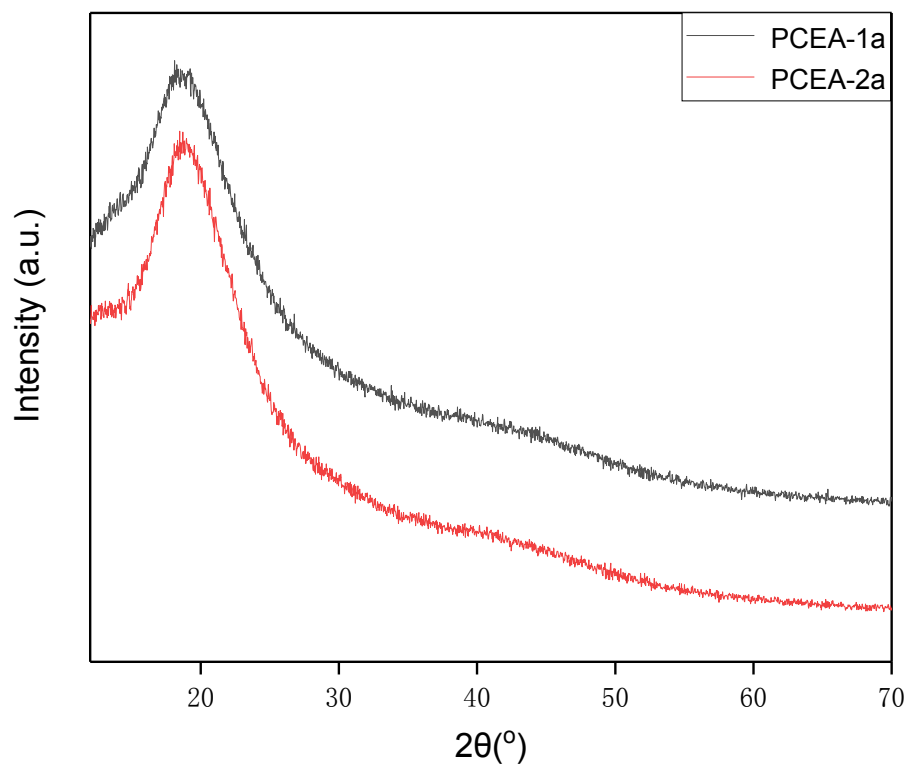

Figure S14. XRD curves of PCEAs.

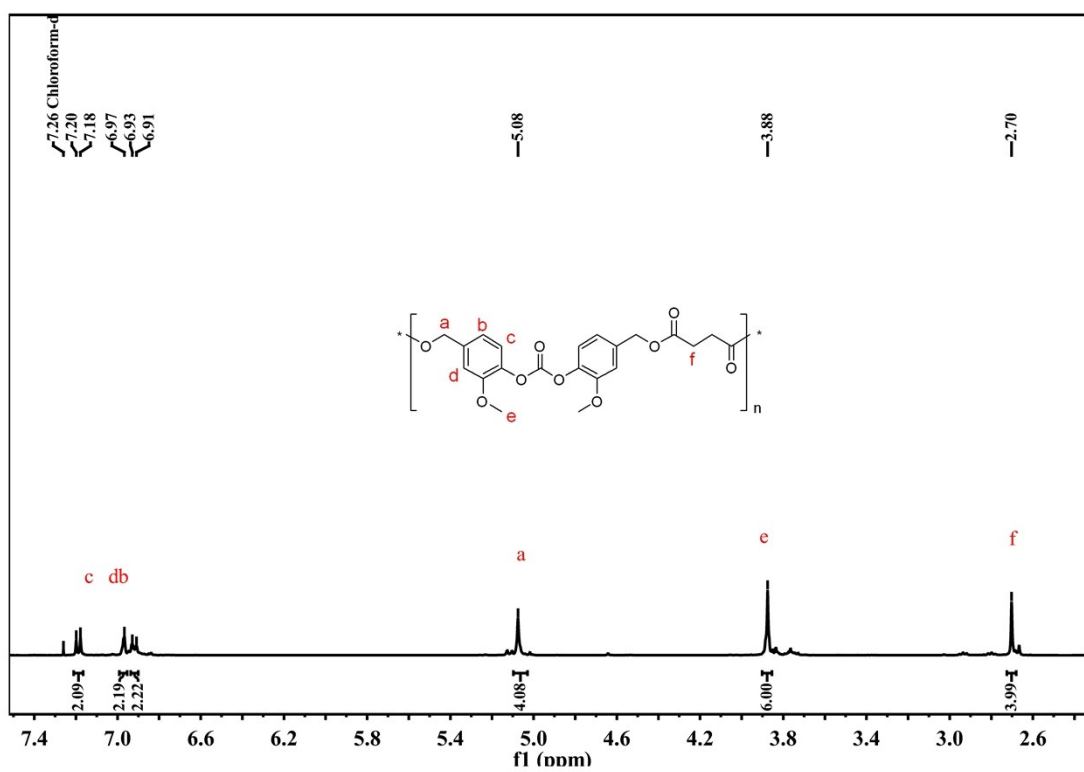

Figure S15.  $^1\text{H}$  NMR of PCE-1 (400 MHz  $\text{CDCl}_3$ ).



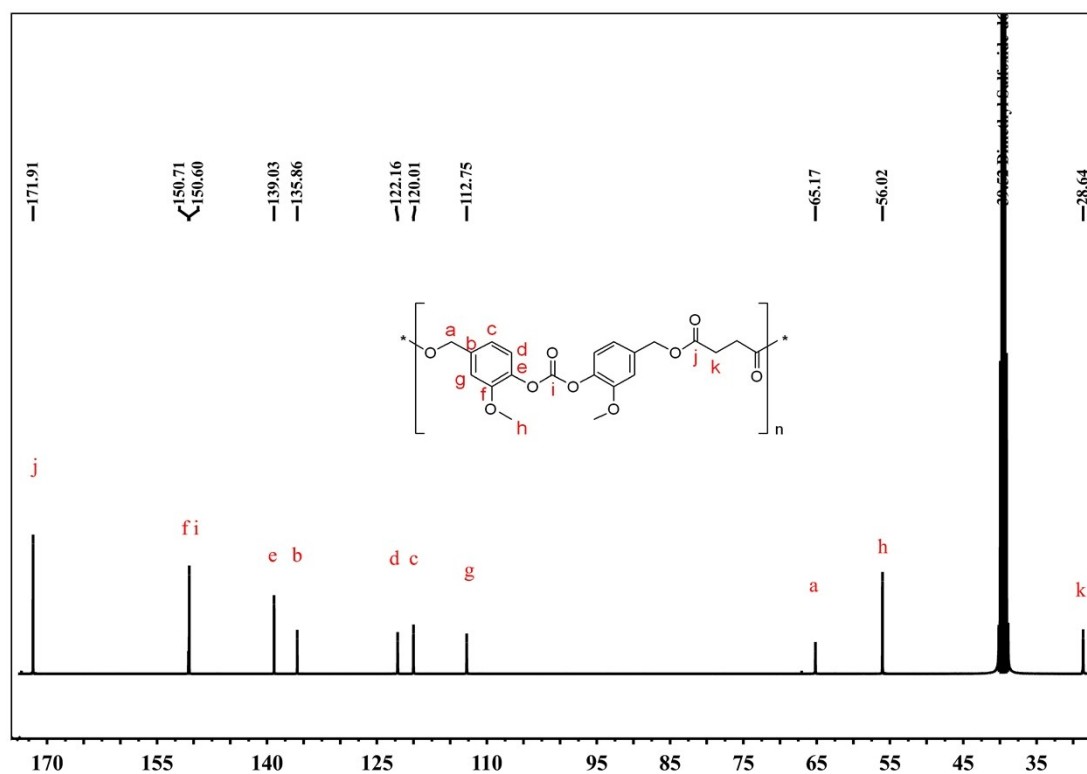

Figure S16.  $^{13}\text{C}$  NMR of PCE-1 (101 MHz DMSO- $d_6$ ).

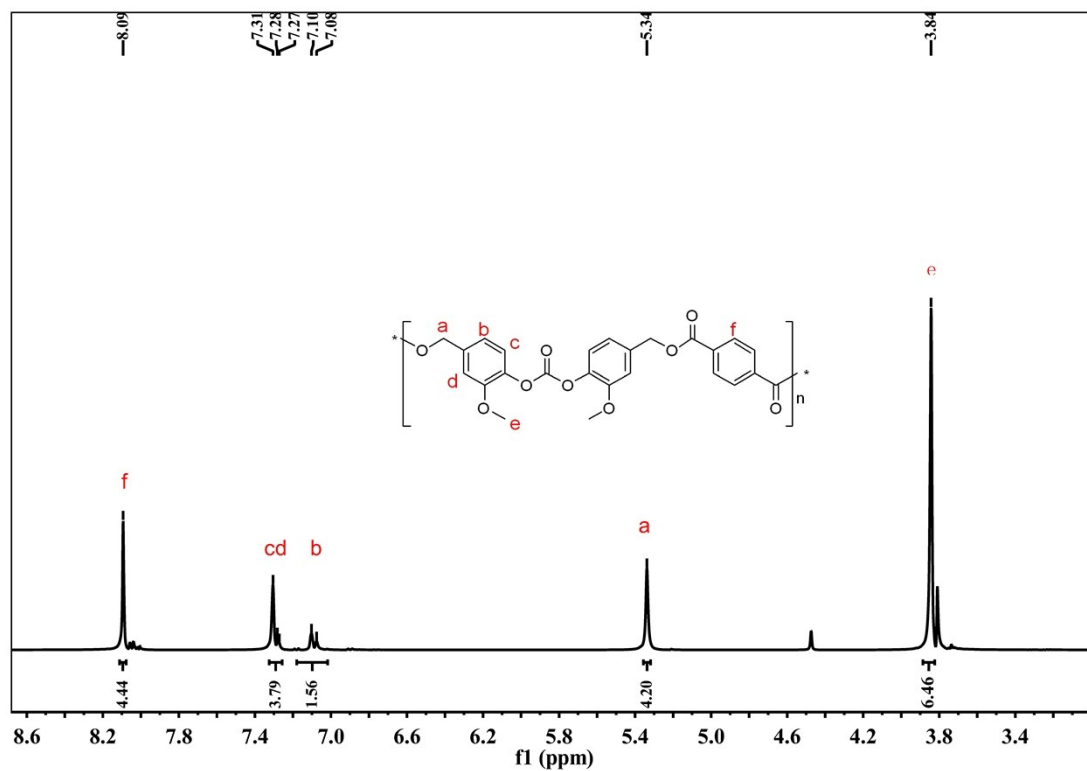

Figure S17.  $^1\text{H}$  NMR of PCE-2 (400 MHz DMSO- $d_6$ ).

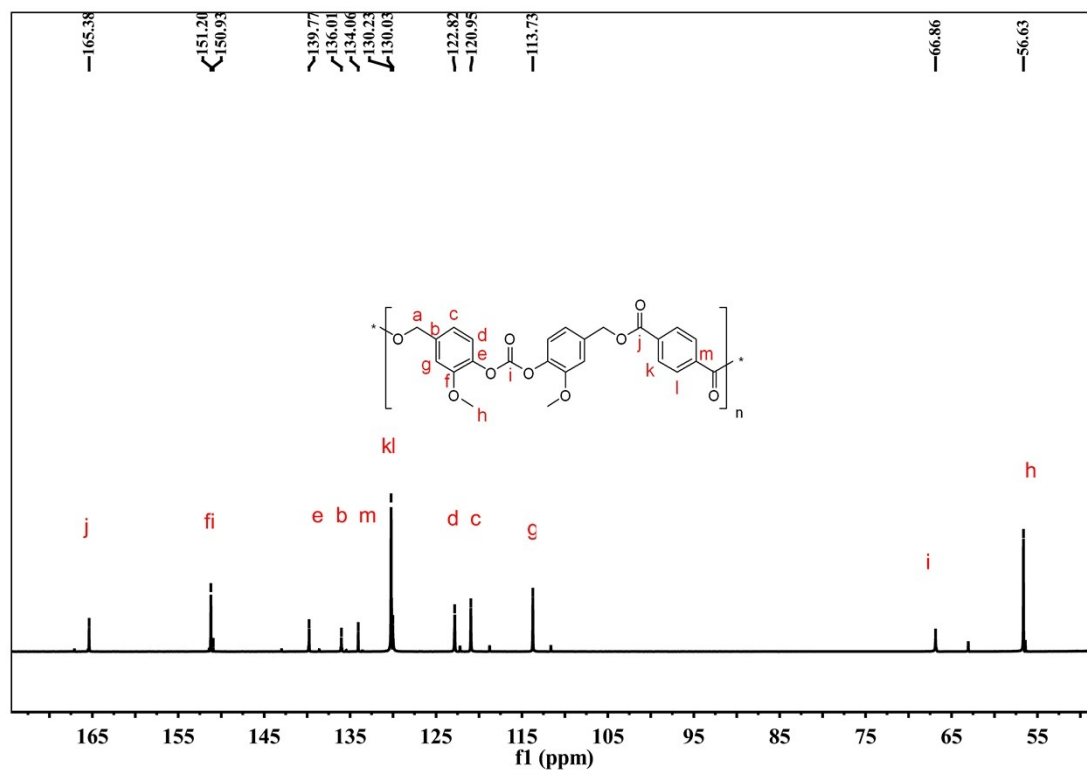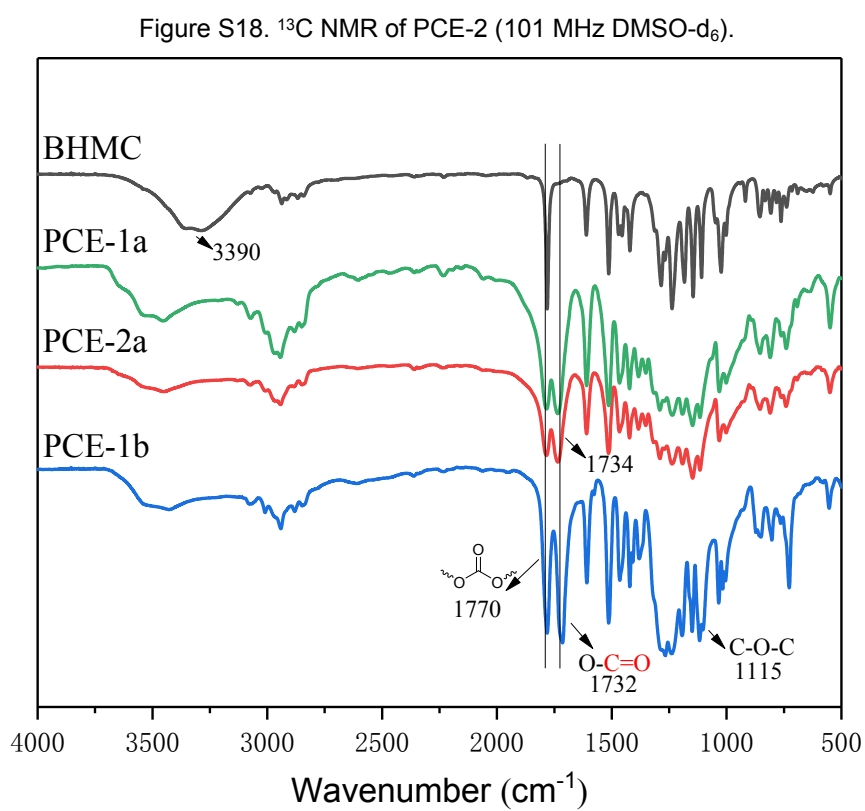

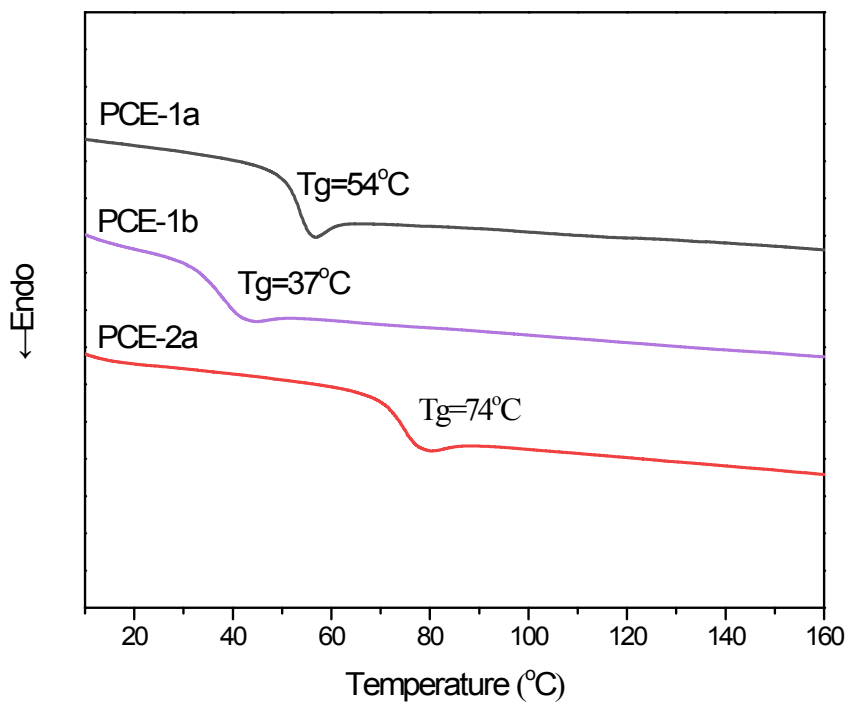

Figure S20. DSC curves of PCEs.

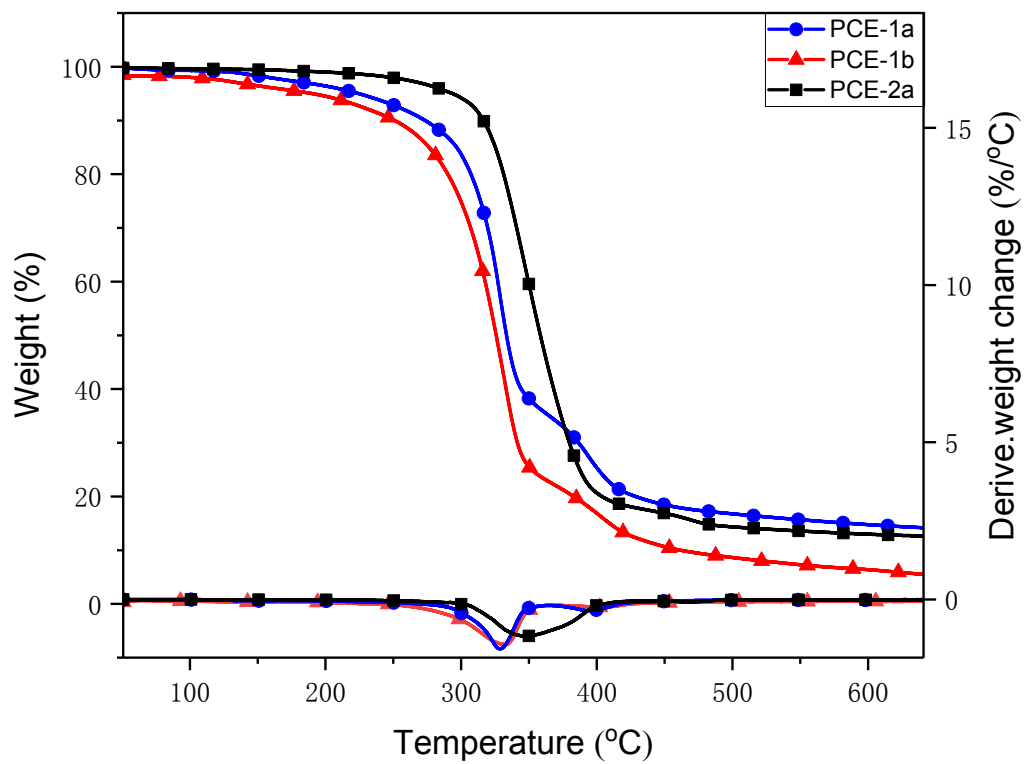

Figure S21. TGA and DTG curves of PCEs.

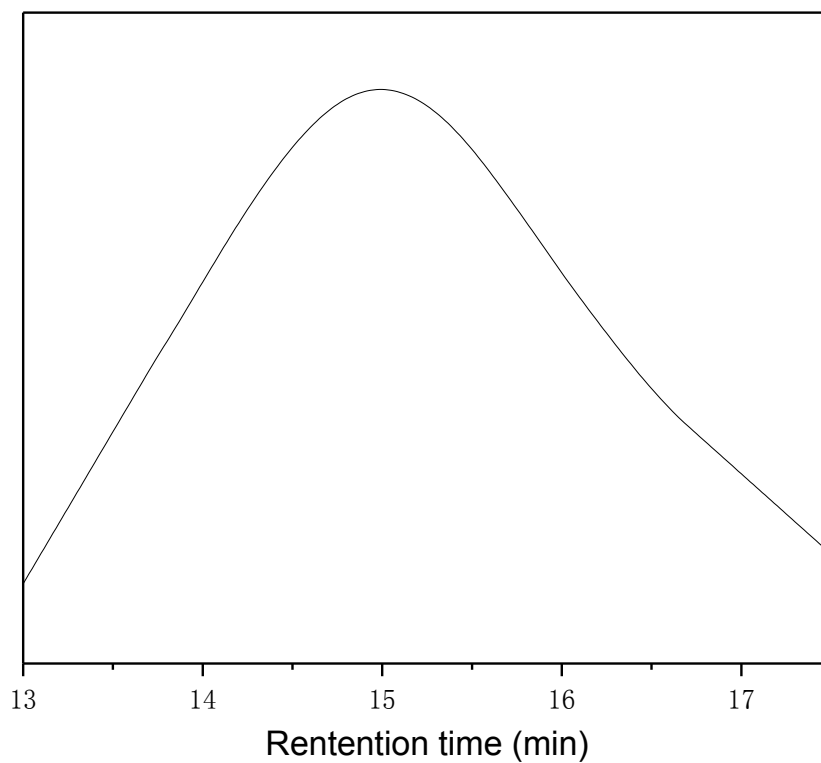

Figure S22. GPC analysis of PCE-1a,  $M_n=5827$  g/mol, PDI=1.65.

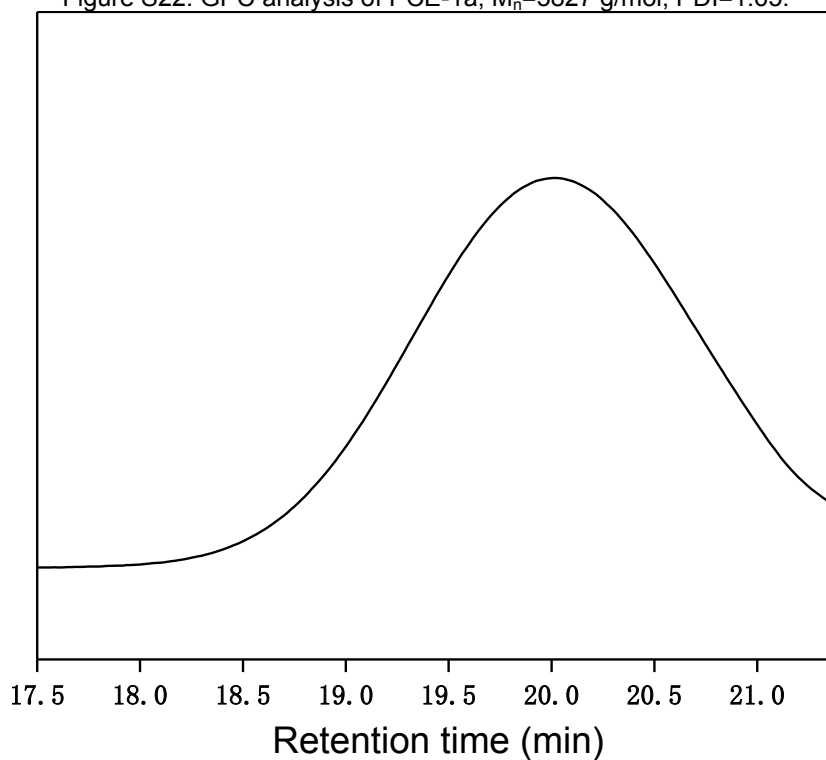

Figure S23. GPC analysis of PCE-1b,  $M_n=7925$  g/mol, PDI=1.61.

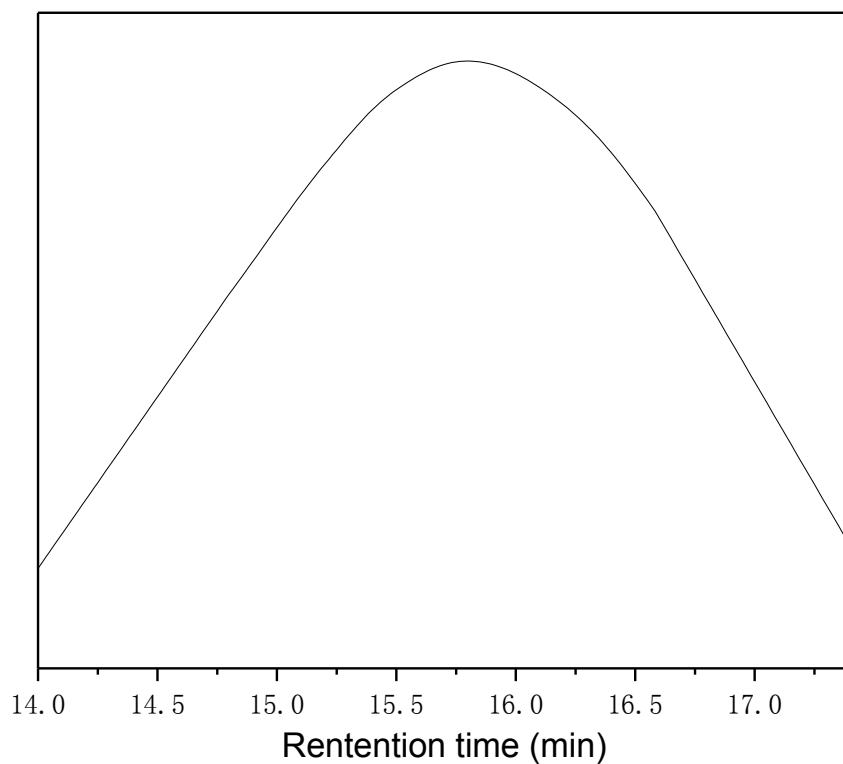

Figure S24. GPC analysis of PCE-2a,  $M_n=3078$  g/mol, PDI=1.31.

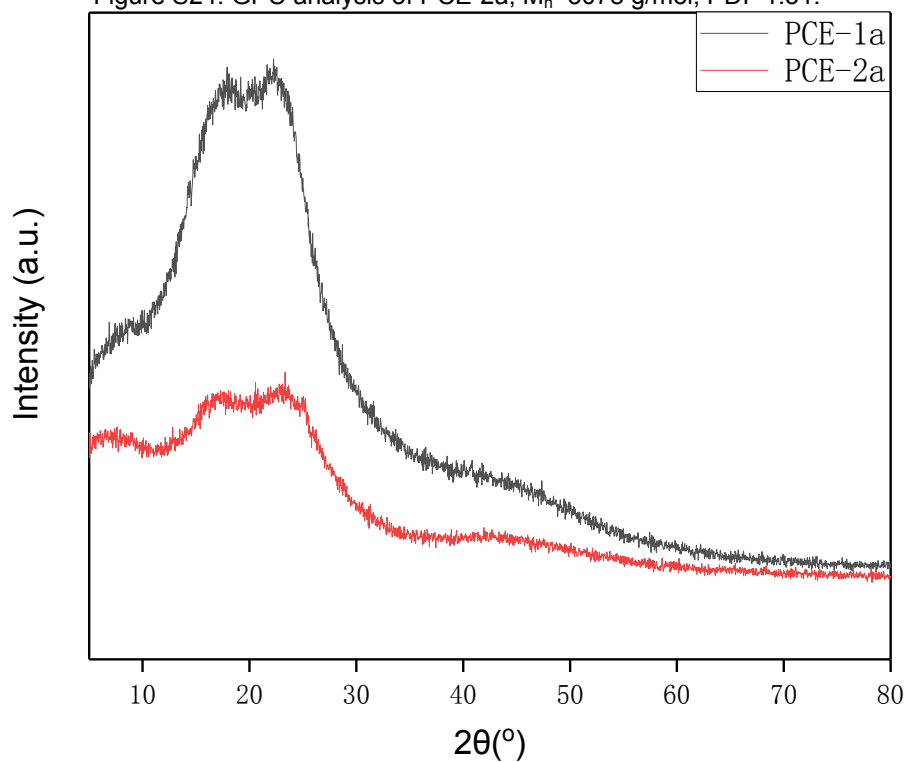

Figure S25. XRD curves of PCEs.

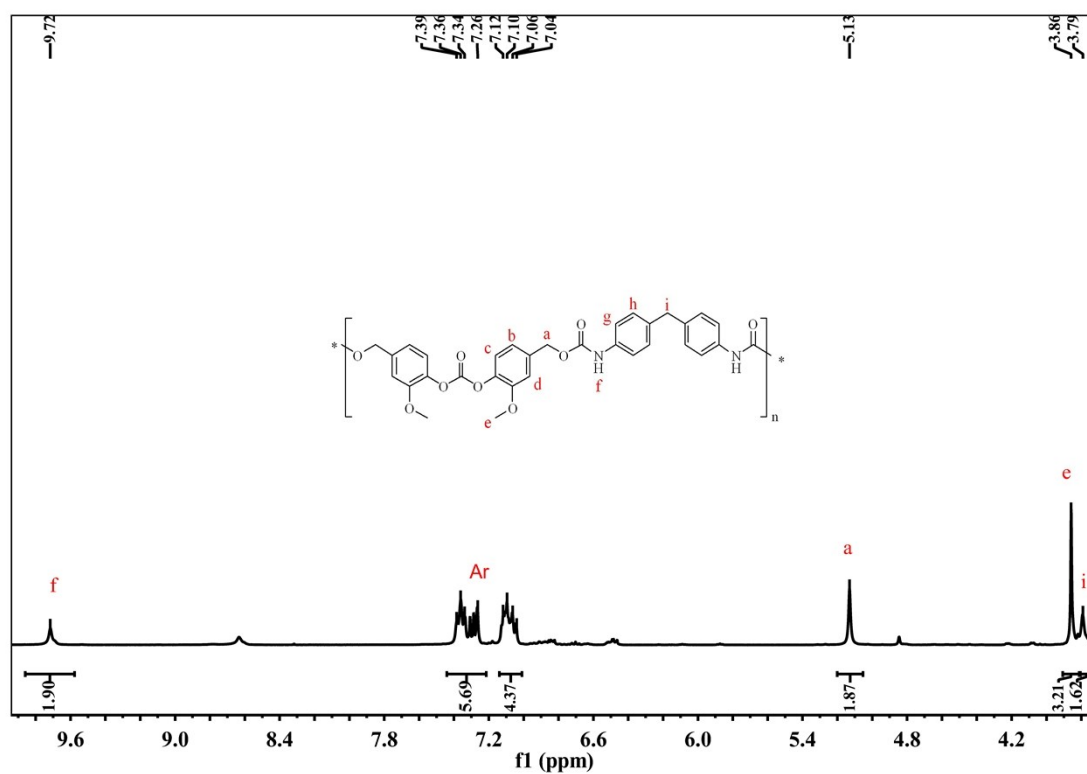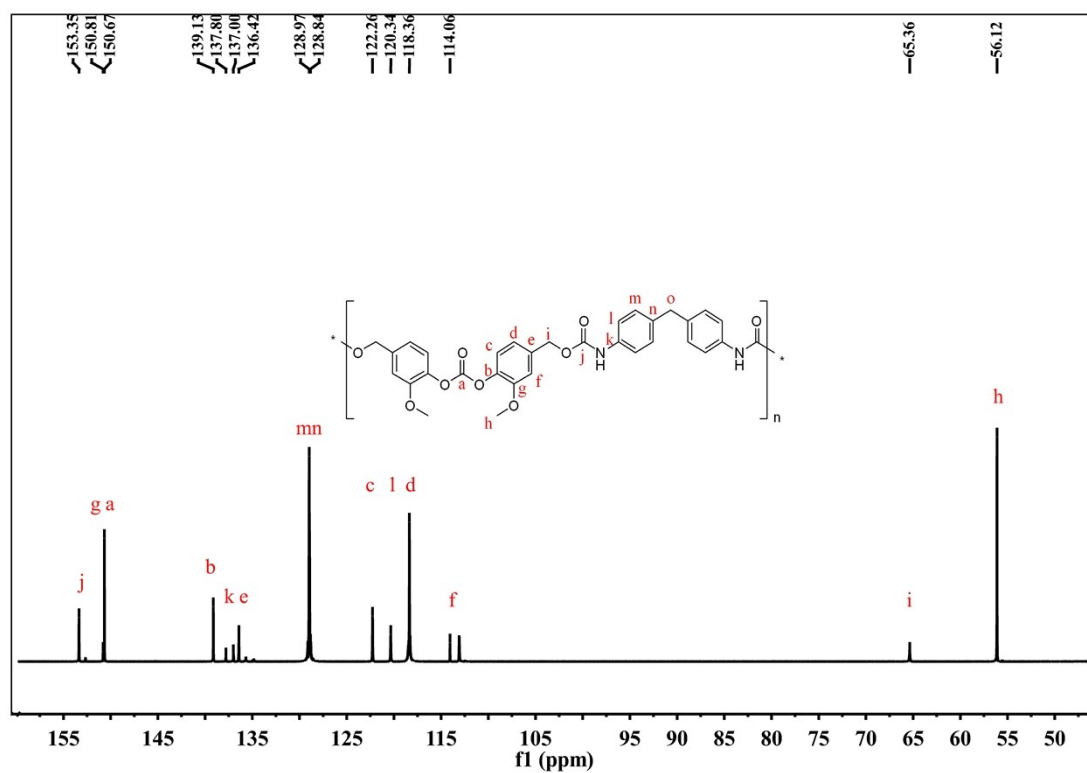

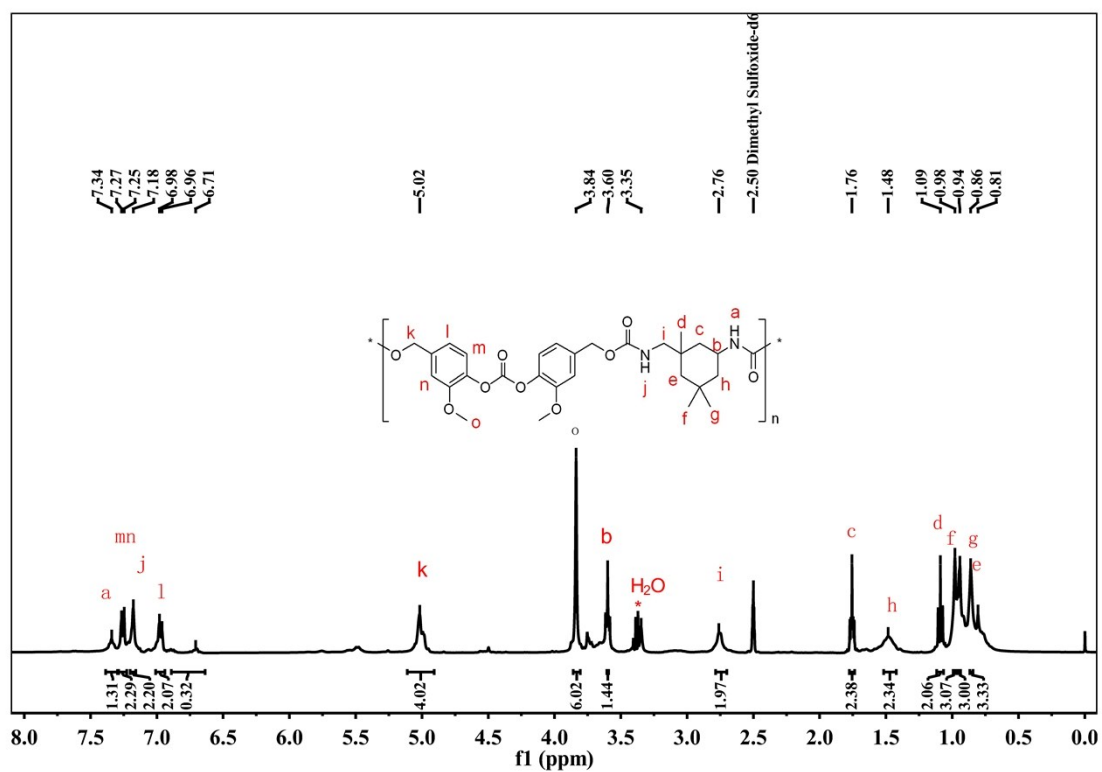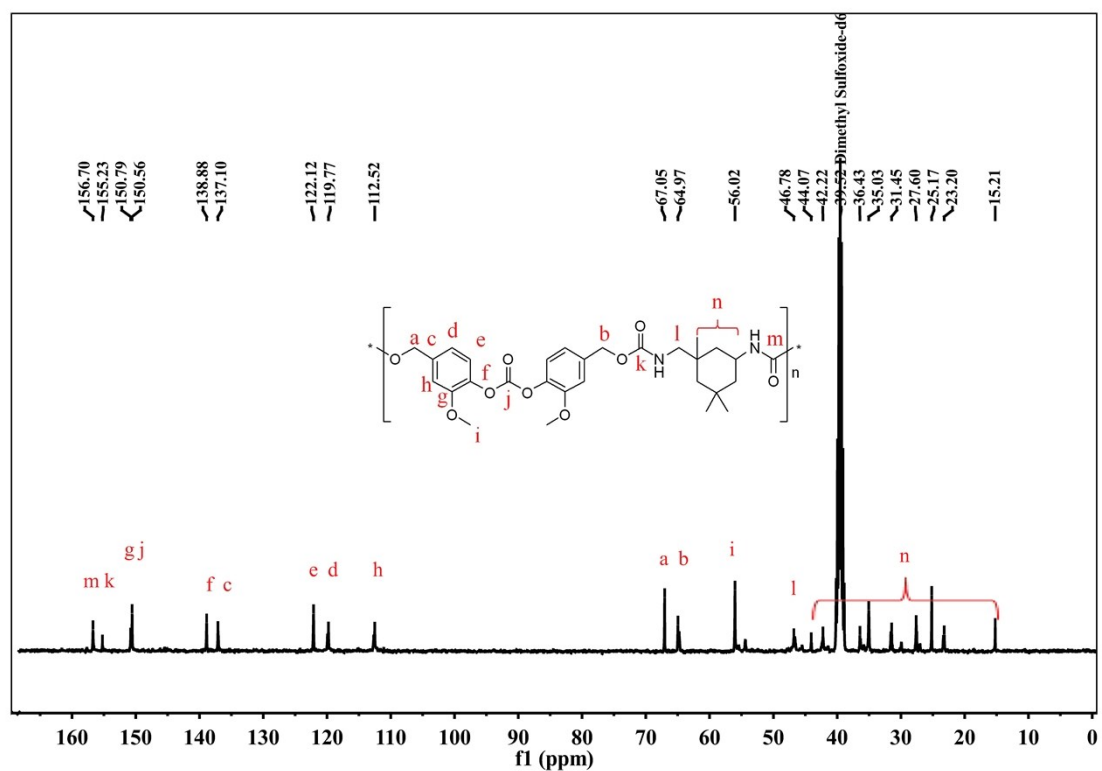

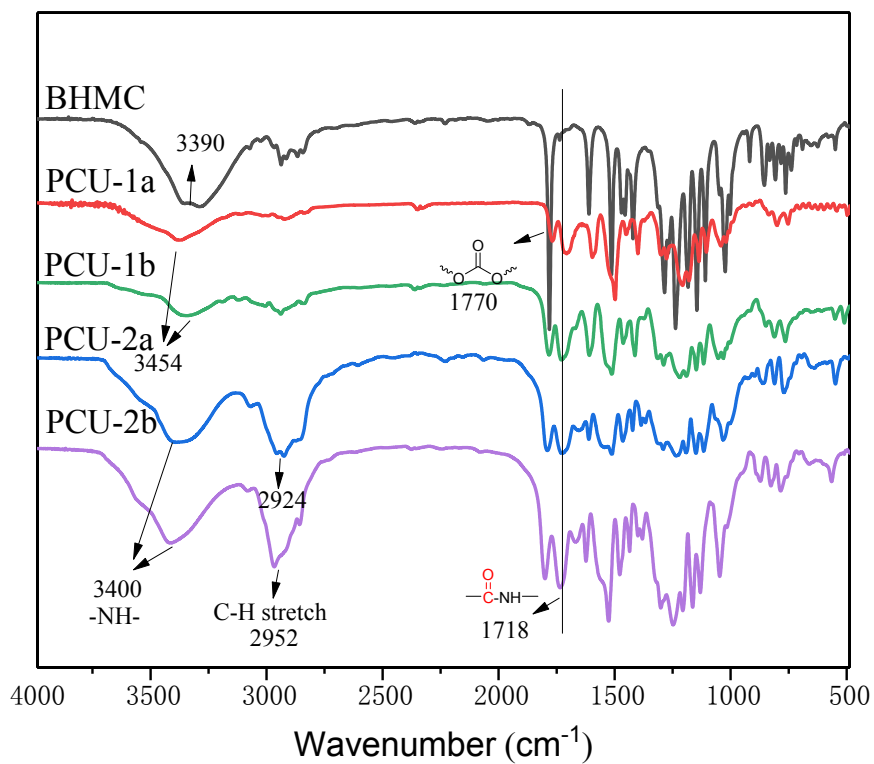

Figure S30. FTIR spectra of BHMC and representative resulting PCUs.

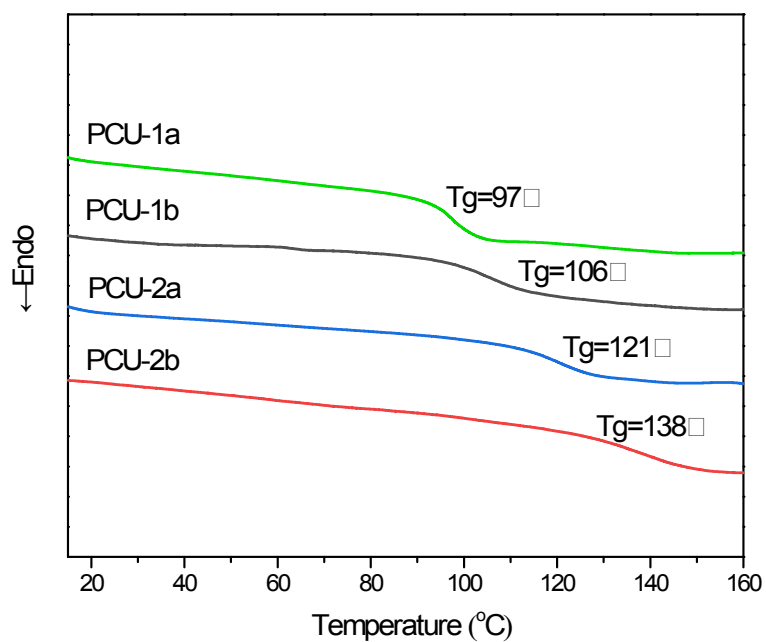

Figure S31. DSC curves of PCUs.



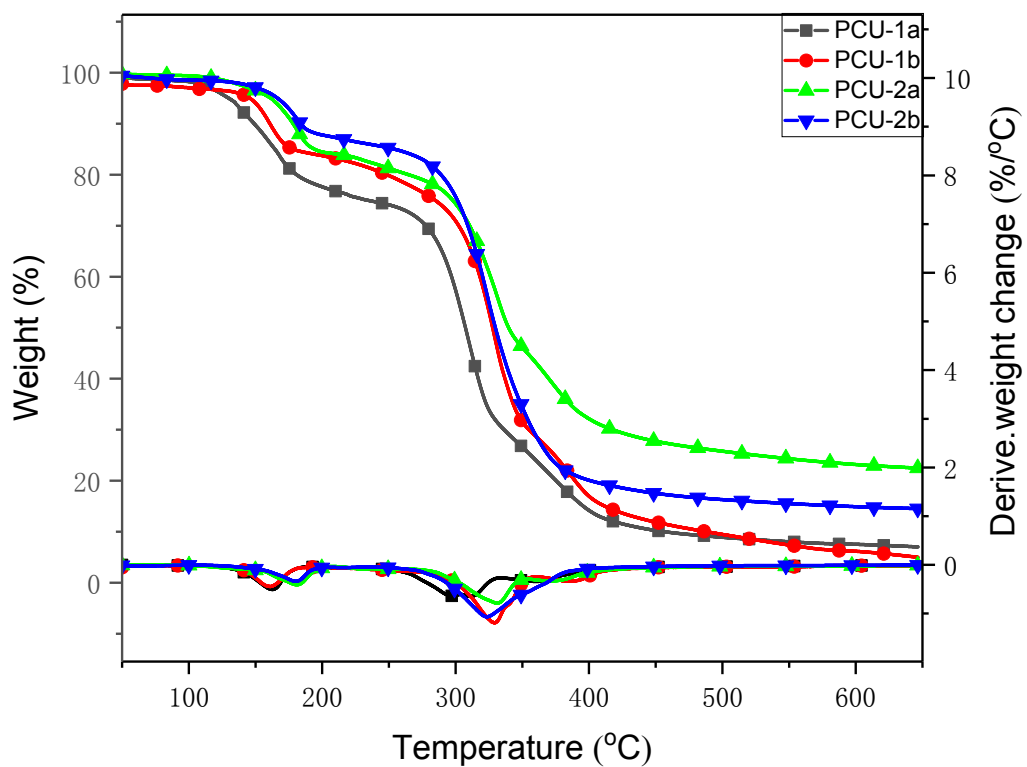

Figure S32. TGA and DTG curves of PCUs.

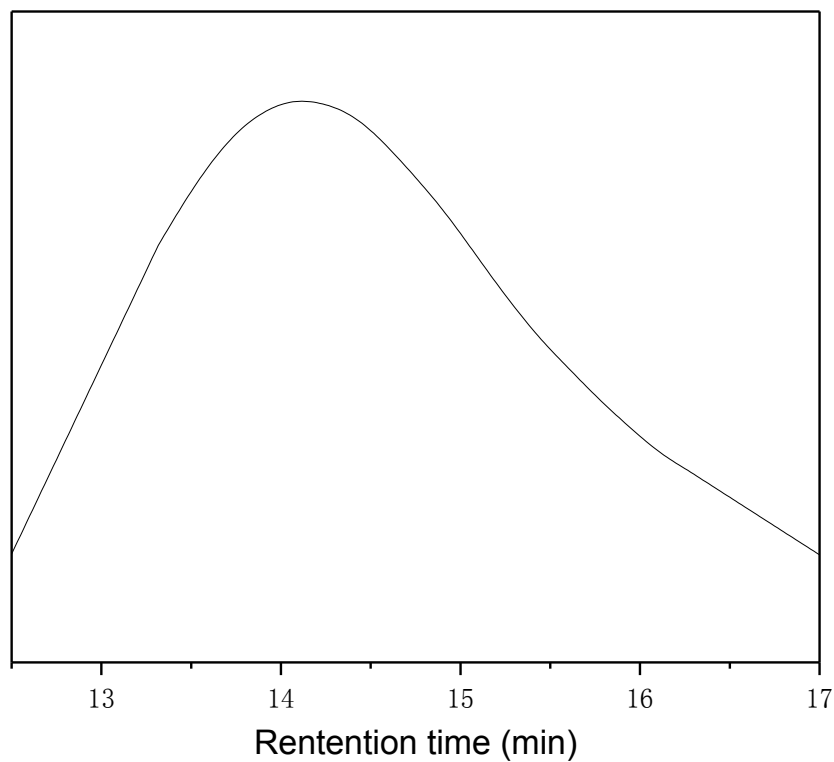

Figure S33. GPC analysis of PCU-1a,  $M_n=15958$  g/mol, PDI=1.84.

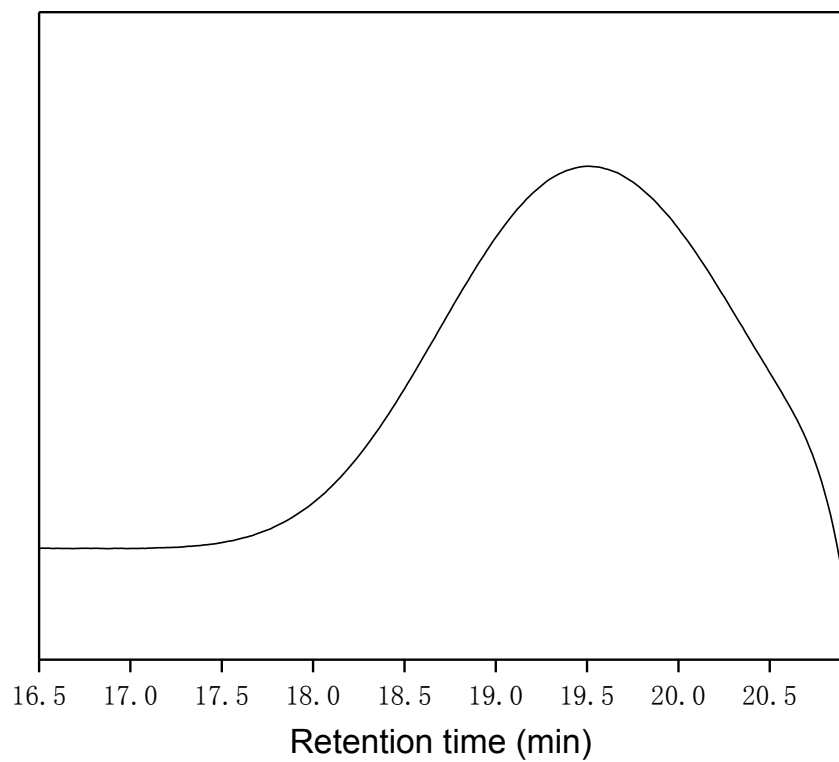

Figure S34. GPC analysis of PCU-1b,  $M_n=16422$  g/mol, PDI=1.36.

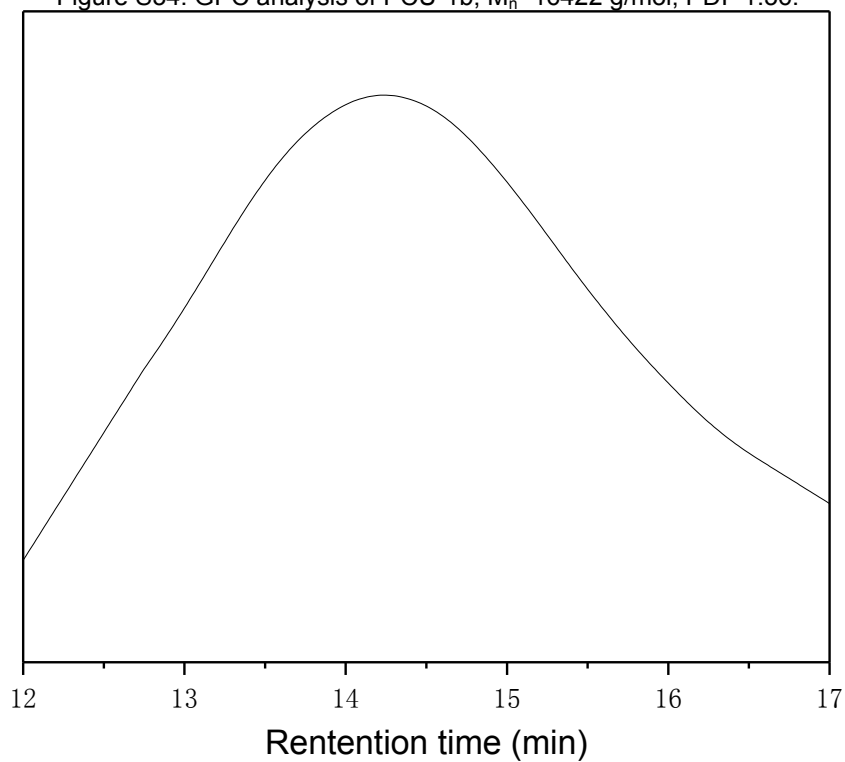

Figure S35. GPC analysis of PCU-2a,  $M_n=19844$  g/mol, PDI=2.17.

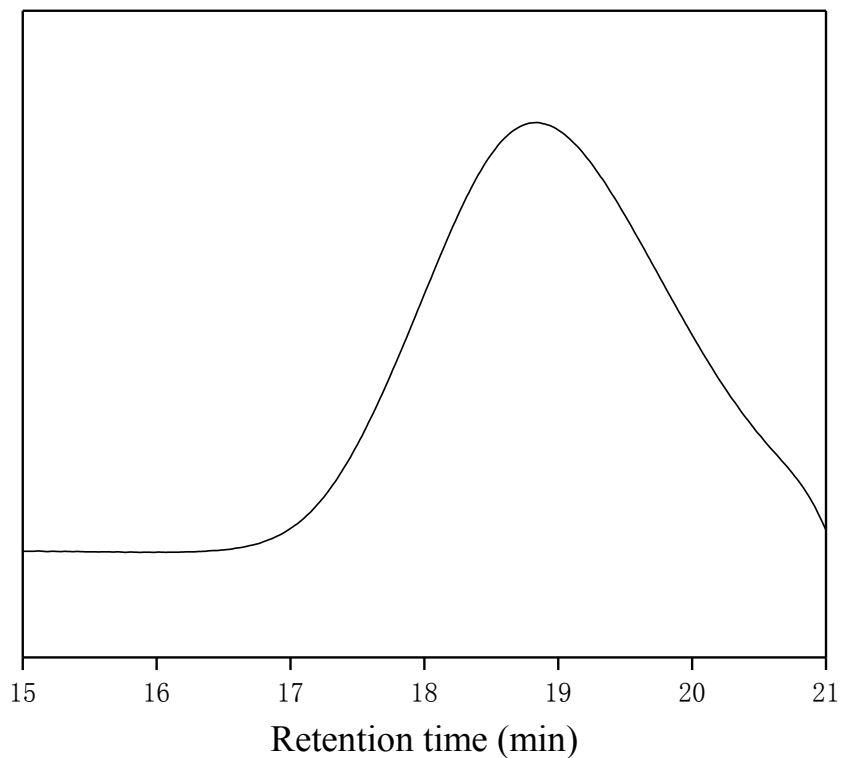

Figure S36. GPC analysis of PCU-2b,  $M_n=24349$  g/mol, PDI=1.61.

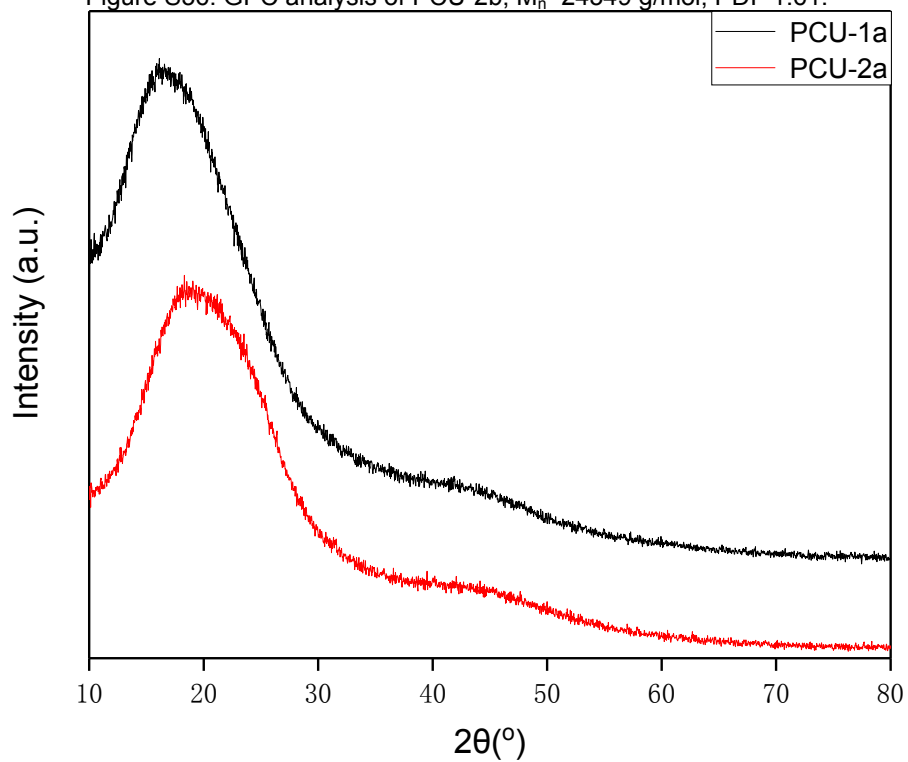

Figure S37. XRD curves of PCUs.

E-factor analysis of the process toward bio-based polyesters

R. A. Sheldon has proposed the environment impact factor (*E*-factor) to quantify the sustainability of a process<sup>1-3</sup>. The *E*-factor is calculated by kilograms of waste generated including 10% of solvent losses divided by kilograms of desired product (Equation 1).

$$E\text{-factor} = \frac{\sum m (\text{rawmaterials}) + \sum m (\text{reagents}) + \sum m (\text{solvents}) \times 10\% - m (\text{product})}{m (\text{product})}$$

Herein we provide details of our *E*-factor analysis of the bio-based polyesters (Tables S1-S6). The overall process *E*-factor of vanillin-based polymer **PCEA-2b**, **PCE-1b** and **PCU-1b** were determined as 4.350, 12.135 and 8.976, kg/kg, respectively, which are in accordance with Sheldon's analysis of bulk and fine chemicals that have an *E*-factor of 4-50<sup>1-3</sup>.

Table S1. Material input-output table for the process toward **PCEA-2b**.

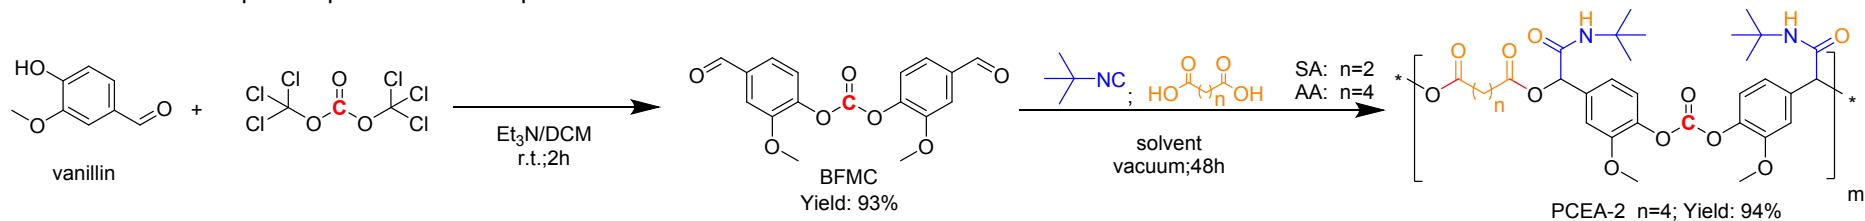

| Step number | Input material        | Input type   | output material | MW (g/mol) | Density (g/mL) | Equiv. | Input mol | input weight (kg) | Input volume (L) | Output weight (kg) | Output mol | Yield |
|-------------|-----------------------|--------------|-----------------|------------|----------------|--------|-----------|-------------------|------------------|--------------------|------------|-------|
| 1           | vanillin              | Raw material |                 | 152.15     |                | 1      | 1.673     | 0.255             |                  |                    |            |       |
|             | triphosgene           | Raw material |                 | 296.75     |                | 0.167  | 0.279     | 0.083             |                  |                    |            |       |
|             | triethylamine         | Reagent      |                 | 101.19     | 0.728          | 1.5    | 2.510     | 0.254             |                  |                    |            |       |
|             | dichloromethane       | Solvnet      |                 | 84.93      | 1.325          |        |           | 39.750            | 30.000           |                    |            |       |
|             |                       |              |                 | BFMC       | 330.29         |        |           |                   |                  |                    | 0.514      | 1.556 |
| 2           | BFMC                  | Intermediate |                 | 330.29     |                | 1      | 1.556     | 0.514             |                  |                    |            |       |
|             | Hexanedioic acid      | Raw material |                 | 146.14     |                | 1      | 1.556     | 0.227             |                  |                    |            |       |
|             | tert-butyl isonitrile | Raw material |                 | 83.13      | 0.735          | 2      | 3.112     | 0.259             |                  |                    |            |       |
|             | dichloromethane       | Solvnet      |                 | 84.93      | 1.325          |        |           | 2.981             | 2.250            |                    |            |       |
|             |                       |              |                 | PCEA-2b    | 642.69         |        |           |                   |                  |                    | 1.000      | 1.556 |

Table S2. E-factor analysis of the process toward **PCEA-2b**.

| step number | Raw material (kg) | Reagent (kg) | Solvent | Product (kg) | step E-Factor | E-Factor |
|-------------|-------------------|--------------|---------|--------------|---------------|----------|
| 1           | 0.337             | 0.254        | 39.750  | 0.514        | 7.885         | 4.052    |
| 2           | 1.000             | 0.00         | 2.981   | 1.000        | 0.298         | 0.298    |
| Total       | 0.823             | 0.254        | 42.731  | 1.000        |               | 4.350    |

Table S3. Material input-output table for the process toward **PCE-1a**.

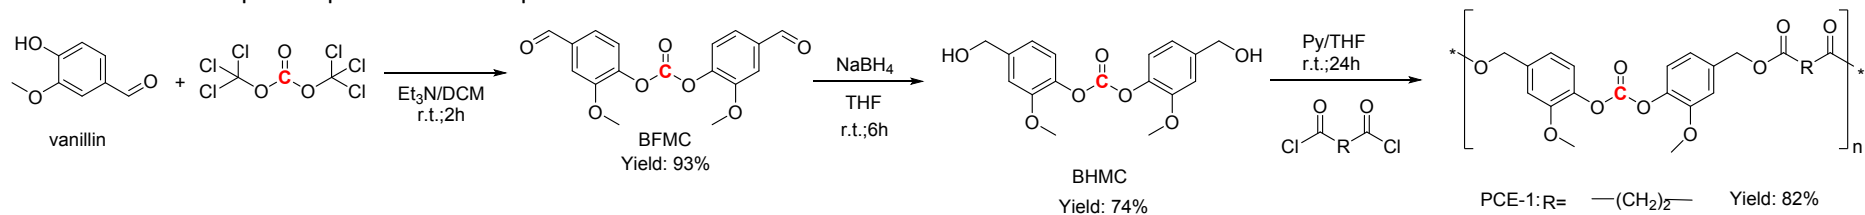

| Step number | Input material     | Input type   | output material | MW (g/mol) | Density (g/mL) | Equiv. | Input mol | input weight (kg) | Input volume (L) | Output weight (kg) | Output mol | Yield   |
|-------------|--------------------|--------------|-----------------|------------|----------------|--------|-----------|-------------------|------------------|--------------------|------------|---------|
| 1           | vanillin           | Raw material |                 | 152.15     |                | 1.000  | 4.091     | 0.622             |                  |                    |            |         |
|             | triphosgene        | Raw material |                 | 296.75     |                | 0.167  | 0.682     | 0.202             |                  |                    |            |         |
|             | triethylamine      | Reagent      |                 | 101.19     | 0.728          | 1.500  | 6.137     | 0.621             |                  |                    |            |         |
|             | dichloromethane    | Solvnet      |                 | 84.93      | 1.325          |        |           | 92.750            | 70.000           |                    |            |         |
|             |                    |              | BFMC            | 330.29     |                |        |           |                   |                  | 1.257              | 3.805      | 93%     |
| 2           | BFMC               | Intermediate |                 | 330.29     |                | 1.000  | 3.805     | 1.257             |                  |                    |            |         |
|             | Sodium borohydride | Raw material |                 | 37.83      |                | 3.000  | 11.414    | 0.432             |                  |                    |            |         |
|             | tetrahydrofuran    | Solvnet      |                 | 72.11      | 0.735          |        |           | 7.350             | 10.000           |                    |            |         |
|             |                    |              | BHMC            | 334.32     |                |        |           |                   |                  | 1.094              | 3.272      | 86%     |
| 3           | BHMC               | Intermediate |                 | 334.32     |                | 1.000  | 3.272     | 1.094             |                  |                    |            |         |
|             | Succinyl chloride  | Raw material |                 | 154.98     | 1.407          | 1.000  | 3.272     | 0.507             |                  |                    |            |         |
|             | pyridine           | Reagent      |                 | 79.1       | 0.983          | 0.022  | 0.072     | 0.006             |                  |                    |            |         |
|             | tetrahydrofuran    | Solvnet      |                 | 72.11      | 0.735          |        |           | 7.350             | 10.000           |                    |            |         |
|             |                    |              | PCE-1a          | 416.38     |                |        |           |                   |                  | 1.000              | 2.402      | 73.40 % |

Table S4. E-factor analysis of the process toward **PCE-1a**.

| step number | Raw material (kg) | Reagent (kg) | Solvent | Product (kg) | step E-Factor | E-Factor |
|-------------|-------------------|--------------|---------|--------------|---------------|----------|
| 1           | 0.825             | 0.621        | 92.750  | 1.257        | 7.531         | 9.464    |
| 2           | 1.688             | 0.000        | 7.350   | 1.094        | 1.215         | 1.330    |
| 3           | 1.601             | 0.006        | 7.350   | 1.000        | 1.342         | 1.342    |
| Total       | 1.764             | 0.627        | 107.45  | 1.000        |               | 12.135   |



Table S5. Material input-output table for the process toward **PCU-1b**.

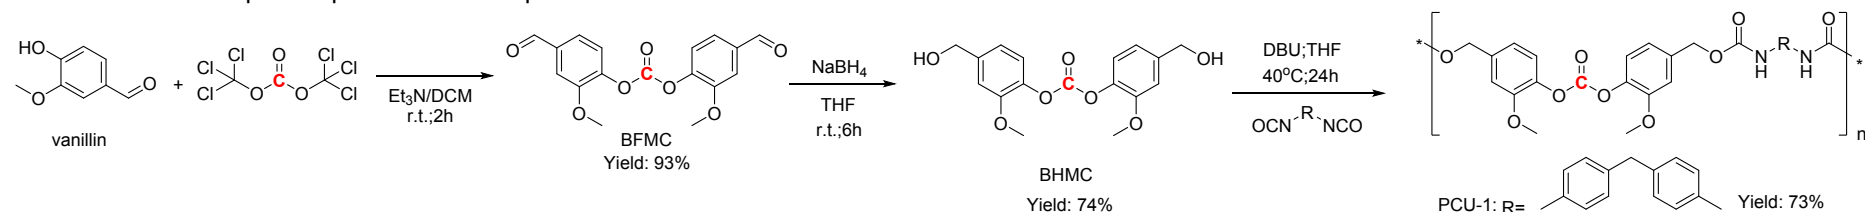

| Step number | Input material               | Input type   | output material | MW (g/mol) | Density (g/mL) | Equiv | Input mol | input weight (kg) | Input volume (L) | Output weight (kg) | Output mol | Yield   |
|-------------|------------------------------|--------------|-----------------|------------|----------------|-------|-----------|-------------------|------------------|--------------------|------------|---------|
| 1           | vanillin                     | Raw material |                 | 152.15     |                | 1.000 | 3.060     | 0.466             |                  |                    |            |         |
|             | triphosgene                  | Raw material |                 | 296.75     |                | 0.167 | 0.510     | 0.151             |                  |                    |            |         |
|             | triethylamine                | Reagent      |                 | 101.19     | 0.728          | 1.500 | 4.591     | 0.465             |                  |                    |            |         |
|             | dichloromethane              | Solvnet      |                 | 84.93      | 1.325          |       |           | 66.250            | 50.000           |                    |            |         |
|             |                              |              | BFMC            | 330.29     |                |       |           |                   |                  | 0.940              | 2.846      | 93%     |
| 2           | BFMC                         | Intermediate |                 | 330.29     |                | 1.000 | 2.846     | 0.940             |                  |                    |            |         |
|             | Sodium borohydride           | Raw material |                 | 37.83      |                | 3.000 | 8.538     | 0.323             |                  |                    |            |         |
|             | tetrahydrofuran              | Solvnet      |                 | 72.11      | 0.735          |       |           | 5.880             | 8.000            |                    |            |         |
|             |                              |              | BHMC            | 334.32     |                |       |           |                   |                  | 0.818              | 2.448      | 86%     |
| 3           | BHMC                         | Intermediate |                 | 334.32     |                | 1.000 | 2.448     | 0.818             |                  |                    |            |         |
|             | diphenylmethane diisocyanate | Raw material |                 | 250.25     |                | 1.000 | 2.448     | 0.613             |                  |                    |            |         |
|             | DBU                          | Reagent      |                 | 152.24     | 1.019          | 0.030 | 0.073     | 0.011             |                  |                    |            |         |
|             | tetrahydrofuran              | Solvnet      |                 | 72.11      | 0.735          |       |           | 7.350             | 10.000           |                    |            |         |
|             |                              |              | PCU-1b          | 556.61     |                |       |           |                   |                  | 1.000              | 1.797      | 73.40 % |

Table S6. E-factor analysis of the process toward **PCU-1b**.

| step number | Raw material (kg) | Reagent (kg) | Solvent | Product (kg) | step E-Factor | E-Factor |
|-------------|-------------------|--------------|---------|--------------|---------------|----------|
|-------------|-------------------|--------------|---------|--------------|---------------|----------|

---

|       |       |       |        |       |       |       |
|-------|-------|-------|--------|-------|-------|-------|
| 1     | 0.617 | 0.465 | 66.250 | 0.940 | 7.198 | 6.766 |
| 2     | 1.263 | 0.000 | 5.880  | 0.818 | 1.262 | 1.033 |
| 3     | 1.431 | 0.011 | 7.350  | 1.000 | 1.177 | 1.177 |
| Total | 1.553 | 0.476 | 79.48  | 1.000 |       | 8.976 |

---
